# Supplementary material for: A photoreactive crystalline quasiracemate
Source: Royal Society of Chemistry journal article supplement (doi:10.1039/c0cc02775h), 2010-01-01
Supplement: c0cc02775h.pdf [file c0cc02775h.pdf]

Electronic supplementary information for:

## **Photoreactive Crystalline Quasiracemates**

**R. C. Grove, S. H. Malehorn, M. E. Breen, Prof. K. A. Wheeler**

*Department of Chemistry, Eastern Illinois University, Charleston, IL 61920, USA. E-mail: kawheeler@eiu.edu; Fax: +1 217 581 6613; Tel: +1 217 581 3119*

## Supporting Information

### General Methods

NMR spectra were recorded using a Bruker Avance 400 MHz FT-NMR spectrometer. Chemical shifts are quoted in parts per million (ppm) calibrated to TMS. Coupling constants ( $J$ ) are quoted in Hertz. Reagents and solvents were obtained from commercial supplies (Aldrich Chemical Co. or Acros Organics) and used without further purifications.

### (2E)-3-[4-(Chlorosulfonyl)phenyl]-2-Propenoic acid

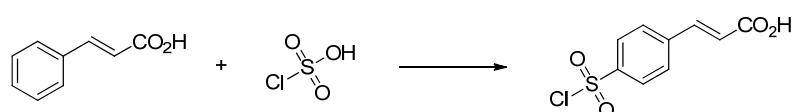

4-Chlorosulfonylcinnamic acid was prepared using a modified literature procedure.<sup>1</sup> To a 250 rd-bottom flask equipped with a stir bar, air condenser, CaCl<sub>2</sub> drying tube, and ice bath (0°C), was added 110 mL of chlorosulfonic acid (1.647 mol). To the vigorously stirred solution of was added (*E*)-cinnamic acid (30.02g, 0.203 mol) portion wise over 4 h to give a light-yellow homogenous mixture. After addition, the reaction mixture was stirred for an additional 14 hrs at 25°C to give a clear orange mixture that was then slowly added to ~50g of ice. The off-white paste was collected using a medium porous glass-frit filter, dried via a vacuum pump (10<sup>-4</sup> torr), suspended in CHCl<sub>3</sub>, filtered, and finally dried via vacuum pump to give an off-white solid (34.682g, 0.141mol, 69.5%). <sup>1</sup>H-NMR(400 MHz, CDCl<sub>3</sub>/DMSO-d<sub>6</sub> 8:1 v/v): δ = 12.21 (br s, 1H, CO<sub>2</sub>H), 8.05 (d,  $J$  = 8.5 Hz, 2H, Ar-H), 7.79 (d,  $J$  = 8.5 Hz, 2H, Ar-H), 7.69 (d,  $J$  = 16.1 Hz, 1H, C<sub>sp<sup>2</sup></sub>-H), 6.60 (d,  $J$  = 16.1 Hz, 1H, C<sub>sp<sup>2</sup></sub>-H).

### 3-[4-[(carboxymethyl)amino]sulfonyl]phenyl]-2-propenoic acids

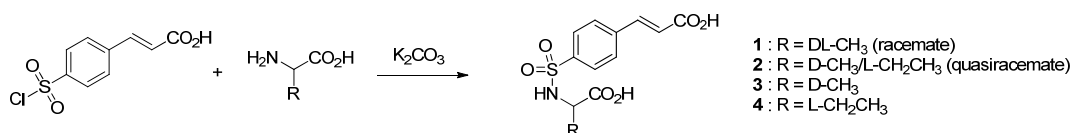

To a 250 rd-bottom flask was added 4-chlorosulfonylcinnamic acid (0.755 g, 3.05 mmol, 1.0 eq.), the appropriate amino acid (3.05 mmol, 1.0 eq.), 100 mL of reagent grade acetone, and 25 mL of deionized H<sub>2</sub>O. The reaction mixture was then stirred at 0°C for 10 minutes to give a light-yellow heterogeneous mixture and then a solution consisting of anhyd. K<sub>2</sub>CO<sub>3</sub> (1.28 g, 9.26 mmol, 3.04 eq.) dissolved in 20 mL of deionized H<sub>2</sub>O was then added over a 20 minute period. Reaction progress assessed via TLC (10:30:1; hexanes, EtOAc, AcOH) showed the presence of product ( $R_f$  = 0.62-0.65) and the absence of chloro sulfonylcinnamic acid ( $R_f$  = 0.82). The acetone from the reaction mixture was removed under *vacuo* and the resulting light-yellow homogenous aqueous layer was acidified ( $pH$  = 2-3) using 6M HCl at 0°C and

<sup>1</sup> P. W. Finn, M. Bandara, C. Butcher, A. Finn, R. Hollinshead, N. Khan, N. Law, S. Murthy, R. Romero, C. Watkins, V. Andrianov, R. Bokaldere, K. Dikovska, V. Gailite, E. Loza, I. Piskunova, I. Starchenkov, M. Vorona, I. Kalvinsh *Helv. Chim. Acta* **2005**, *988*, 1630-1657.

extracted with 3x25 mL EtOAc. The combined organic extracts were dried over anhydrous MgSO<sub>4</sub> and reduced under *vacuo* to give light-yellow solids (51-56% yields).

**1:** 52% yield, Mp. 230 (dec). <sup>1</sup>H-NMR (400 MHz, CDCl<sub>3</sub>/DMSO-*d*<sub>6</sub> 8:1 v/v): δ = 7.86 (d, *J* = 8.4 Hz, 2H, Ar-H), 7.68 (d, *J* = 8.4 Hz, 2H, Ar-H), 7.62 (d, *J* = 16.0 Hz, 1H, C<sub>sp2</sub>-H), 6.53 (d, *J* = 16.0 Hz, 2H, C<sub>sp2</sub>-H), 3.85 (m, 1H, R<sub>3</sub>-CH), 1.27 (d, *J* = 7.2, 3H, CH<sub>3</sub>). <sup>13</sup>C-NMR(100 MHz, CDCl<sub>3</sub>/DMSO-*d*<sub>6</sub> 8:1 v/v): δ 172.7, 167.3, 143.5, 143.3, 139.4, 129.5, 128.5, 122.3, 50.6, 18.5.

**3:** 56 % yield, Mp. 205 (dec). <sup>1</sup>H NMR (400 MHz, CDCl<sub>3</sub>/DMSO-*d*<sub>6</sub> 8:1 v/v): δ = 7.87 (d, *J* = 8.4 Hz, 2H, Ar-H), 7.65 (d, *J* = 8.4 Hz, 2H, Ar-H), 7.63 (d, *J* = 16.0 Hz, 1H, C<sub>sp2</sub>-H), 6.51 (d, *J* = 16.0 Hz, 1H, C<sub>sp2</sub>-H), 3.89 (m, 1H, R<sub>3</sub>-CH), 1.30 (d, *J* = 7.2 Hz, 3H, CH<sub>3</sub>). <sup>13</sup>C NMR (100 MHz, CDCl<sub>3</sub>/DMSO-*d*<sub>6</sub> 8:1 v/v): δ 173.2, 167.4, 141.8, 141.1, 137.8, 127.6, 127.7, 121.4, 50.8, 18.8.

**4:** 51 % yield, Mp. 225 (dec). <sup>1</sup>H NMR (100 MHz, CDCl<sub>3</sub>/DMSO-*d*<sub>6</sub> 8:1 v/v): δ = 7.85 (d, *J* = 8.4 Hz, 2H, Ar-H), 7.65 (d, *J* = 8.4 Hz, 2H, Ar-H), 7.62 (d, *J* = 15.5 Hz, 1H, C<sub>sp2</sub>-H), 6.51 (d, *J* = 15.5 Hz, 1H, C<sub>sp2</sub>-H), 3.76 (m, 1H, R<sub>3</sub>-CH), 1.71 (m, 2H, -CH<sub>2</sub>-), 0.09 (t, *J* = 7.4Hz, 3H, CH<sub>3</sub>). <sup>13</sup>C-NMR 100 MHz, CDCl<sub>3</sub>/DMSO-*d*<sub>6</sub> 8:1 v/v): δ 172.9, 167.3, 141.7, 141.1, 137.7, 129.5, 127.7, 126.9, 55.6, 33.3, 15.1.
